# Supplementary material for: Design of a nitridoalumosilicate red phosphor synthesized under mild conditions
Source: Royal Society of Chemistry journal article supplement (doi:10.1039/d2dt03221j), 2022-01-01
Supplement: d2dt03221j1.pdf [file d2dt03221j1.pdf]

## Supporting Information

### Design of a Nitridoalumosilicate Red Phosphor Synthesized Under Mild Conditions

Jianyan Ding<sup>1</sup>, Quansheng Wu<sup>1\*</sup>, Xufeng Zhou<sup>2</sup> and Shanshan Ye<sup>1</sup>

<sup>1</sup> College of Chemistry & Materials Science, Longyan University, Longyan, Fujian, 364000, China

<sup>2</sup> College of Materials Science and Engineering, Liaocheng University, Liaocheng, Shandong, 252000, China

\*Address correspondence to E-mail: wuqsh1989@qq.com.

## Experiment section

### Materials synthesis

A series of  $\text{Ca}_{4-4x}\text{SiAl}_3\text{N}_7: x\text{Eu}^{2+}$  ( $0 \leq x \leq 0.005$ ) samples were synthesized through sample-pressure sintering. Appropriate amounts of  $\text{Ca}_3\text{N}_2$  (Aldrich, >95.0%),  $\text{AlN}$  (Aldrich, >98.0%),  $\text{Si}_3\text{N}_4$  (Aldrich, 99.5%) and  $\text{EuCl}_3$  (>99.999%, Aladdin) were weighted and ground in a nitrogen-filled glovebox. The mixture was compressed into an alumina crucible, and then placed into a horizontal tube furnace and annealed at 1350 °C in a  $\text{N}_2$  atmosphere for four hours. Finally, the furnace-cooled samples were ground into powder for further measurements.

### Measurements and characterizations

The phases of  $\text{Ca}_{4-4x}\text{SiAl}_3\text{N}_7: x\text{Eu}^{2+}$  ( $0 \leq x \leq 0.005$ ) were identified by powder X-ray diffraction (PXRD) through a PANalytical X'Pert powder X-ray diffractometer. The Rietveld refinement was carried out using the GSAS program. The morphology of the powder was recorded by a SEM (S-3400, Hitachi, Japan).

The photoluminescence (PL), photoluminescence excitation (PLE) spectra, decay curves, temperature-dependent PL spectra and time-resolved PL (TRPL) spectra of the samples were measured by a FS5 fluorescence spectrometer. The TRPL spectra are constructed by slicing a series of decay curves of the sample obtained by monitoring a continuous wavelength range (500-500 nm, interval of 5 nm). The diffusion reflectance

spectroscopy (DRS) of Eu<sup>2+</sup>-doped and un-doped Ca<sub>4</sub>SiAl<sub>3</sub>N<sub>7</sub> were measured by a Shimadzu UV-2700 spectrophotometer.

The WLEDs were packaged by a SH2012 ultrasonic wire welding machine. The optical performances of the WLEDs were evaluated using a PMS-80 UV-vis-near IR spectrophotometer.

The bandgap is calculated by the following equations:

$$(\alpha hv)^n = A(hv - E_g) \quad (1)$$

$$\alpha = \frac{(1 - R)^2}{2R} \quad (2)$$

Where  $\alpha$  is the absorption coefficient,  $hv$  is the incident photo energy,  $A$  is a constant, and  $n = 1/2$  for indirect bandgap.

The decay curve is well fitted by a two exponential function, which can be expressed by the following equation:

$$I = A_1 \exp^{(-t/\tau_1)} + A_2 \exp^{(-t/\tau_2)} \quad (3)$$

where  $I$  is the emission intensity,  $t$  is the time,  $A_1$  and  $A_2$  are the fitted constants,  $\tau_1$  and  $\tau_2$  are the lifetime. Thus, the average decay time can be calculated via the following formula:

$$\tau = \frac{(A_1 \tau_1^2 + A_2 \tau_2^2)}{(A_1 \tau_1 + A_2 \tau_2)} \quad (4)$$

The thermal quenching activation energy ( $\Delta E$ ) of the sample was calculated through the Arrhenius equation:<sup>22</sup>

$$I(T) = I_0/[1 + A \exp(-\Delta E/kT)] \quad (5)$$

Where  $T$  represents temperature,  $I(T)$  is the emission intensity of the sample at temperature  $T$ ,  $I_0$  is the initial emission intensity,  $A$  is the ordinary constant, and  $K$  is the Boltzmann constant.

The critical distance ( $R_c$ ) for Eu<sup>2+</sup> quenching in Ca<sub>4</sub>SiAl<sub>3</sub>N<sub>7</sub> was calculated based on the following formula :

$$R_c = 2 \left[ \frac{3V}{4\pi N x_c} \right]^{\frac{1}{3}} \quad (6)$$

where  $x_c$  is the optimal  $\text{Eu}^{2+}$  doping concentration,  $V$  is the unit cell volume, and  $N$  is the number of  $\text{Ca}^{2+}$  atoms in a single unit cell.

Table S1 Crystal structure information of several silicon-based nitrides

| Phase                                         | Si/ (Al+Si ) | Smallest structural unit        | Basic structural unit                                   | Connection type                                                          | Ref.      |
|-----------------------------------------------|--------------|---------------------------------|---------------------------------------------------------|--------------------------------------------------------------------------|-----------|
| $\text{Sr}_2\text{Si}_5\text{N}_8$            | 1            | $\text{SiN}_4$                  | $\text{Si}_6\text{N}_{18}$ six-membered ring            | common angle, common edge                                                | [23]      |
| $\text{CaSiN}_2$                              | 1            | $\text{SiN}_4$                  | $\text{Si}_6\text{N}_{18}$ six-membered ring            | common angle, common edge                                                | [24]      |
| $\text{Ba}_2\text{AlSi}_5\text{N}_9$          | 5/6          | $\text{SiN}_4$ , $\text{AlN}_4$ | $\text{Si}(\text{Al})_6\text{N}_{18}$ six-membered ring | common angle, common edge                                                | [25]      |
| $\text{SrAlSi}_4\text{N}_7$                   | 4/5          | $\text{SiN}_4$ , $\text{AlN}_4$ | $\text{Si}_6\text{AlN}_{21}$ seven-membered ring        | $\text{AlN}_4$ -common edge, $\text{SiN}_4$ -common angle                | [26]      |
| $\text{CaAlSiN}_3$                            | 1/2          | $\text{SiN}_4$ , $\text{AlN}_4$ | $\text{Si}(\text{Al})_6\text{N}_{18}$ six-membered ring | common angle                                                             | [19]      |
| $\text{Ca}_5\text{Si}_2\text{Al}_2\text{N}_8$ | 1/2          | $\text{SiN}_4$ , $\text{AlN}_4$ | $\text{Al}_6\text{N}_{18}$ six-membered ring            | $\text{AlN}_4$ - common angle, common edge, $\text{SiN}_4$ - common edge | [27]      |
| $\text{Ca}_4\text{SiAl}_3\text{N}_7$          | 1/4          | $\text{SiN}_4$ , $\text{AlN}_4$ | $\text{Al}_4\text{SiN}_{15}$ five-membered ring         | $\text{AlN}_4$ - common angle, common edge, $\text{SiN}_4$ - common edge | This work |

Table S2 crystallographic data of  $\text{Ca}_4\text{SiAl}_3\text{N}_7$

Formula sum:  $\text{Ca}_4\text{SiAl}_3\text{N}_7$

Formula weight: 1101.06 g/mol

Crystal system: triclinic

Space-group: P -1 (2)

Cell parameters:  $a=5.8778 \text{ \AA}$ ,  $b=8.1422 \text{ \AA}$ ,  $c=13.0503 \text{ \AA}$ ,  $\alpha=78.2130^\circ$ ,  $\beta=76.8350^\circ$ ,  $\gamma=82.3320^\circ$ ,

Cell ratio:  $a/b=0.7219$   $b/c=0.6239$   $c/a=2.2203$

Cell volume:  $592.85 \text{ \AA}^3$

---

Calc. density: 3.08385 g/cm<sup>3</sup>

Formula type: N<sub>2</sub>O<sub>10</sub>P<sub>12</sub>Q<sub>21</sub>

Wyckoff sequence: i22a

---

Table S3 Atomic parameters of Ca<sub>4</sub>SiAl<sub>3</sub>N<sub>7</sub>

| Atom | Wyck. | x/a    | y/b    | z/c    |
|------|-------|--------|--------|--------|
| Ca1  | 2i    | 0.0949 | 0.0433 | 0.6526 |
| Ca2  | 2i    | 0.1163 | 0.2899 | 0.9860 |
| Ca3  | 2i    | 0.2950 | 0.4018 | 0.4618 |
| Ca4  | 2i    | 0.5011 | 0.2567 | 0.7110 |
| Ca5  | 2i    | 0.6021 | 0.0664 | 0.0976 |
| Ca6  | 2i    | 0.7594 | 0.3465 | 0.2192 |
| Si1  | 2i    | 0.1191 | 0.9249 | 0.1246 |
| Al1  | 2i    | 0.0050 | 0.5976 | 0.3023 |
| Al2  | 2i    | 0.1797 | 0.7246 | 0.5312 |
| Al3  | 2i    | 0.2508 | 0.2268 | 0.2574 |
| Al4  | 2i    | 0.3939 | 0.5721 | 0.0854 |
| Al5  | 2i    | 0.3990 | 0.0638 | 0.4183 |
| N1   | 2i    | 0.0960 | 0.2164 | 0.7917 |
| N2   | 2i    | 0.1016 | 0.1681 | 0.4041 |
| N3   | 2i    | 0.1166 | 0.6800 | 0.4044 |
| N4   | 2i    | 0.1295 | 0.1217 | 0.1722 |
| N5   | 2i    | 0.2399 | 0.4615 | 0.2229 |
| N6   | 2i    | 0.2638 | 0.5208 | 0.6263 |
| N7   | 2i    | 0.4182 | 0.8042 | 0.0940 |
| N8   | 2i    | 0.5419 | 0.1111 | 0.2769 |
| N9   | 2i    | 0.5474 | 0.1559 | 0.5092 |
| N10  | 2i    | 0.7052 | 0.4473 | 0.0425 |
| N11  | 1a    | 0      | 0      | 0      |

Table S4 The bond length data of Ca-N bond

| type    | bond length<br>(Å) | type    | bond length<br>(Å) | type    | bond length<br>(Å) |
|---------|--------------------|---------|--------------------|---------|--------------------|
| Ca1-N1  | 2.517(2)           | Ca2-N1  | 2.735(1)           | Ca3-N2  | 2.652(4)           |
| Ca1-N2  | 2.507(3)           | Ca2-N4  | 2.545(3)           | Ca3-N3  | 2.413(2)           |
| Ca1-N3  | 2.483(5)           | Ca2-N7  | 2.749(3)           | Ca3-N3  | 2.728(4)           |
| Ca1-N4  | 2.573(4)           | Ca2-N10 | 2.432(2)           | Ca3-N6  | 2.494 (1)          |
| Ca1-N8  | 2.564(1)           | Ca2-N10 | 2.595(5)           | Ca3-N6  | 2.688 (2)          |
| Ca1-N9  | 3.016(2)           | Ca2-N11 | 2.504(5)           | Ca3-N9  | 2.390 (3)          |
| Ca4-N1  | 2.411(2)           | Ca5-N1  | 3.017(6)           | Ca6-N4  | 2.864(5)           |
| Ca4-N3  | 2.456(5)           | Ca5-N4  | 2.735(4)           | Ca6-N5  | 3.065(5)           |
| Ca4-N6  | 2.593(5)           | Ca5-N7  | 2.530(4)           | Ca6-N5  | 3.097(6)           |
| Ca4-N7  | 2.636(3)           | Ca5-N7  | 2.550(4)           | Ca6-N6  | 2.445(3)           |
| Ca4-N8  | 2.999(1)           | Ca5-N8  | 2.381(2)           | Ca6-N8  | 2.345(4)           |
| Ca4-N9  | 2.860(1)           | Ca5-N11 | 2.443(3)           | Ca6-N10 | 2.363(4)           |
| Average | 2.617              |         |                    |         |                    |

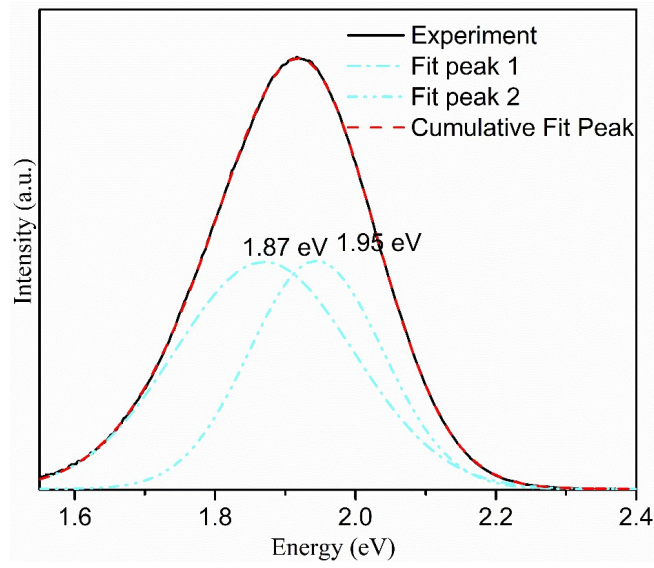

Fig. S1 Gauss Fit of the emission of  $\text{Ca}_4\text{SiAl}_3\text{N}_7:\text{Eu}^{2+}$ .

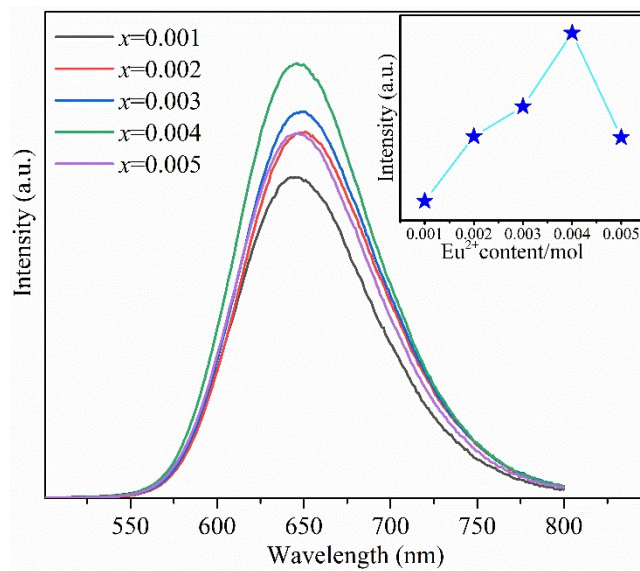

Fig. S2 Emission spectra of  $\text{Ca}_{4-4x}\text{SiAl}_3\text{N}_7: x\text{Eu}^{2+}$  ( $0 \leq x \leq 0.005$ ).

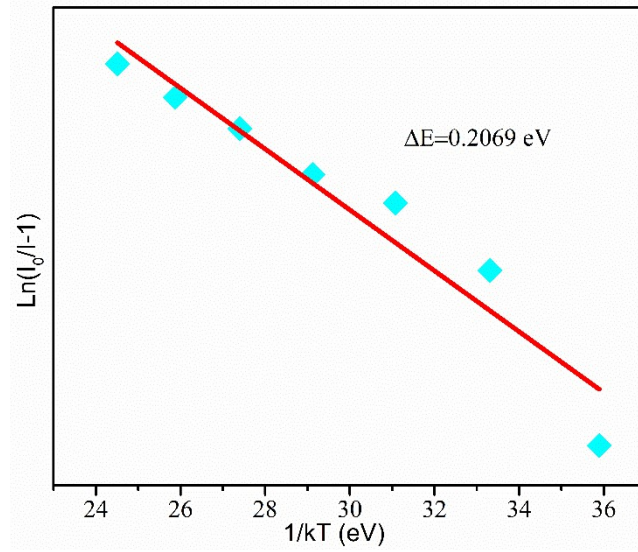

Fig. S3 Relationship between  $\ln(I_0/I-1)$  and  $1/KT$ .

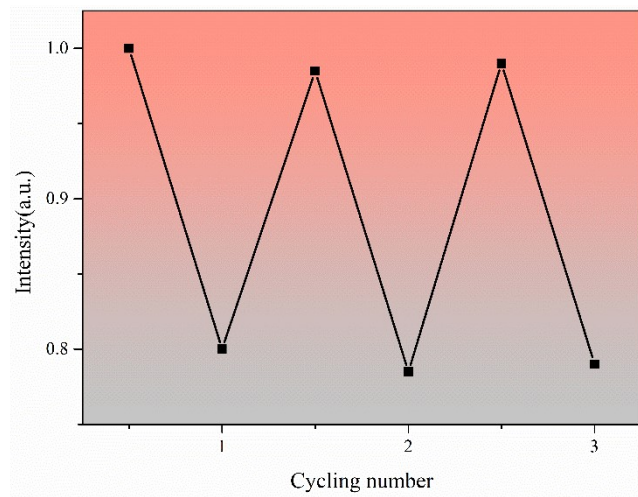

Fig. S4 Dependent of emission intensity on thermal quenching cycle between 298 and 473 K.
